# Supplementary material for: Gender and Age Differences in the Core Triad of Impairments in Autism Spectrum Disorders: A Systematic Review and Meta-analysis
Source: Springer Nature journal article supplement (doi:10.1007/s10803-013-1913-9), 2013-08-29
Supplement: MOESM2 [file 556756]

*Appendix II: Measuring instruments*

| **Nr** | **Instrument** | **Social** | **Communication** | **Repetitive and stereotyped behaviour** | **Total** | **Measures** | **Parent/ Patient or observer** | **Retrospective?** |
| --- | --- | --- | --- | --- | --- | --- | --- | --- |
| **1** | ADI | 1 | 1 | 1 | 3 | Developmental history and current behaviour | P | Partial |
| **2** | ADI-R | 8 | 6 | 7 | 21 | Developmental history and current behaviour | P | Partial |
| **3** | ADOS | 5 | 5 | 4 | 14 | Semi-structured assessment | O | No |
| **4** | ADOS-G | 2 | 2 | 1 | 5 | Semi-structured assessment | O | No |
| **5** | CAST | 1 | 1 | 1 | 3 | Autistic traits in children | P | Partial |
| **6** | DASH II | 0 | 0 | 1 | 1 | Frequency (last two weeks) | P | No |
| **7** | 3DI | 1 | 1 | 1 | 3 | Developmental history current and past symptoms | P | Partial |
| **8** | ASD-DC | 2 | 1 | 1 | 4 | ASD symptoms, comorbidity, challenging behaviour | P | Partial |
| **9** | Biscuit | 2 | 2 | 2 | 6 | Autism traits (babies, infants) | P | No |
| **10** | RBS-R | 0 | 0 | 1 | 1 | Restricted and rep behaviour | P | No |
| **11** | ASD CC | 0 | 0 | 1 | 1 | Current comorbidity | P | No |
| **12** | AQ-C | 2 | 2 | 0 | 4 | Autistic traits in children | P | No |
| **13** | AQ | 4 | 2 | 0 | 6 | Autistic traits in adults | Pt | No |
| **14** | VABS, | 6 | 6 | 0 | 12 | Social and personal sufficiency | P | No |
| **15** | Vineland, VSMS | 1 | 0 | 0 | 1 | social maturity or social competence | P | No |
| **16** | SRS-total | 1 | 0 | 0 | 1 | Social responsiveness | P | No |
| **17** | SCQ | 1 | 0 | 0 | 1 | Communication, social skills | P | No |
| **18** | Develop- ment profile | 1 | 0 | 0 | 1 | Emotional needs for people, manners in friendship | P | No |
