# Supplementary material for: Gender and Age Differences in the Core Triad of Impairments in Autism Spectrum Disorders: A Systematic Review and Meta-analysis
Source: Springer Nature journal article supplement (doi:10.1007/s10803-013-1913-9), 2013-08-29
Supplement: MOESM3 [file 556756]

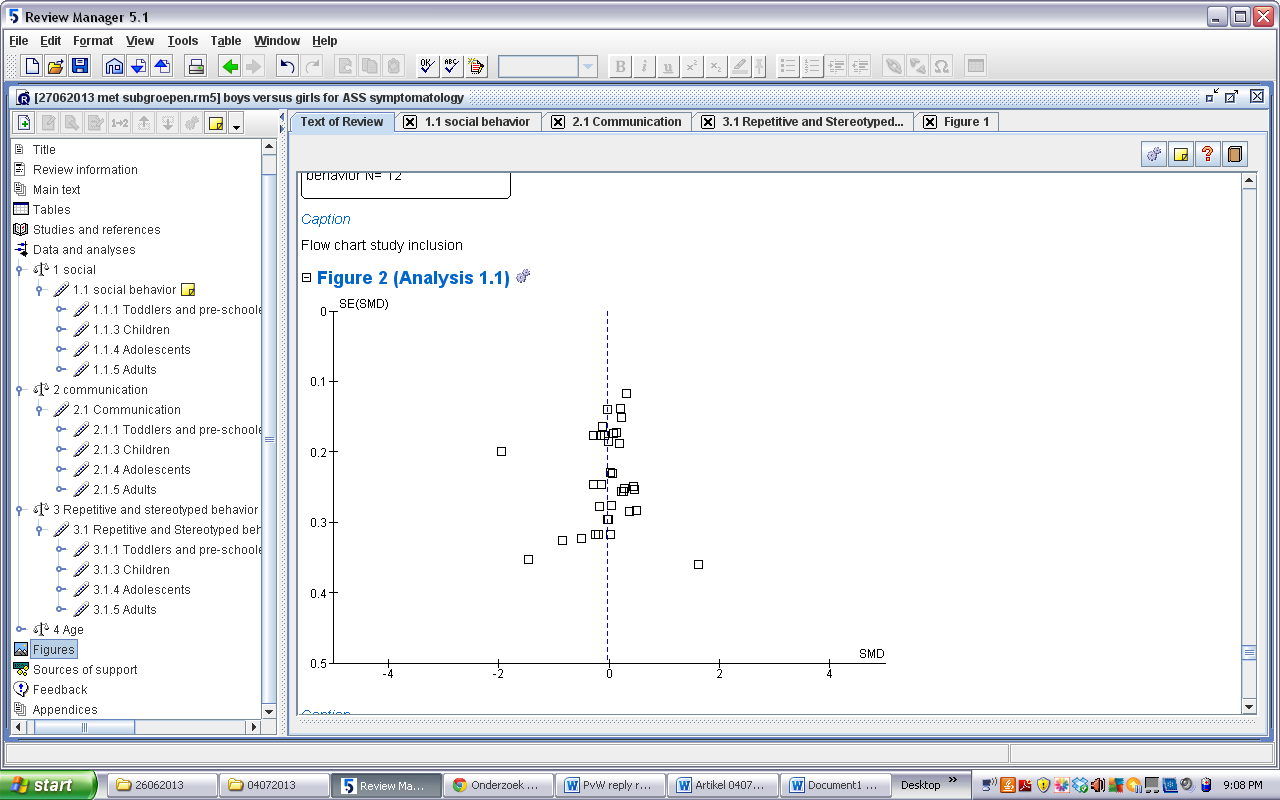


Funnelplot social behavior

- Rechtsonder: Mclennan (early)
- Linksboven: Hartley
- Links onder: McLennan (current)


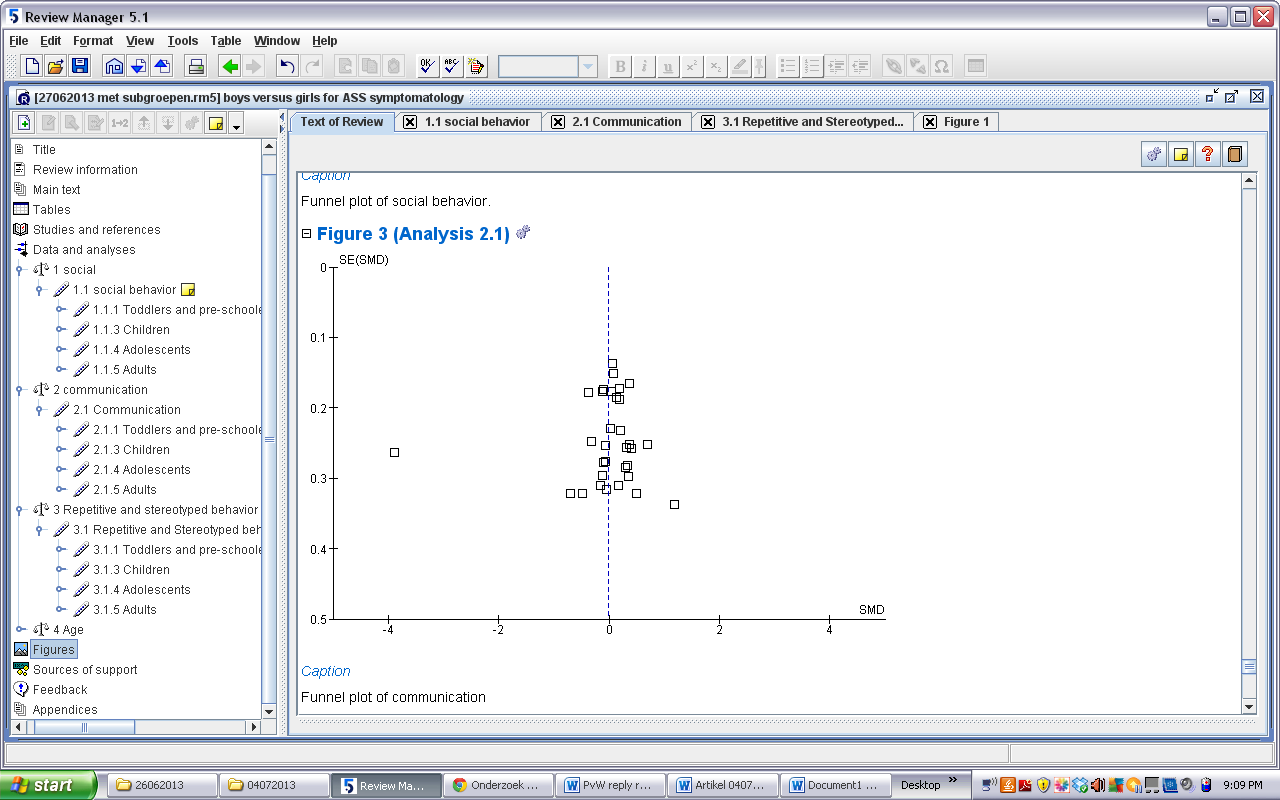


Funnelplot communication

- Hartley


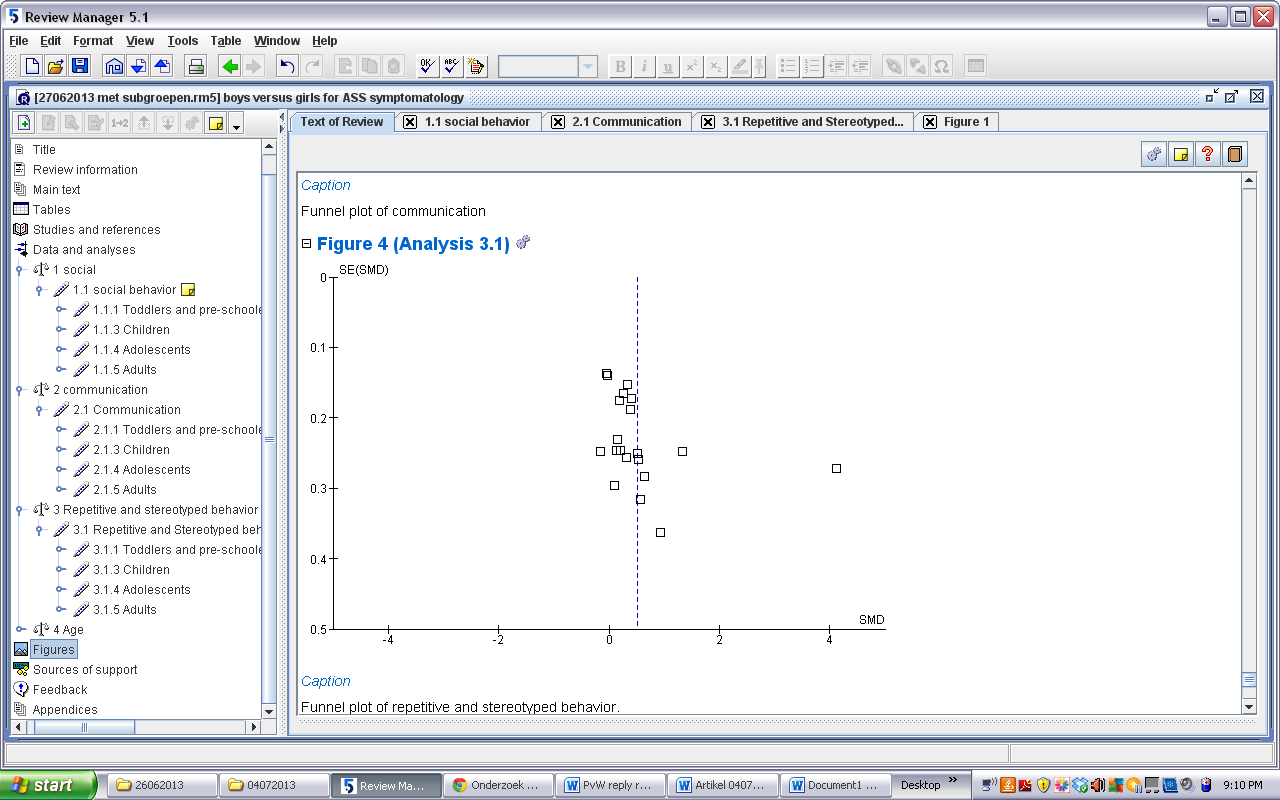


Funnel Repetive and stereotyped behavior

- Hartley
